# Supplementary material for: Estimating the differences in critical thermal maximum and metabolic rate of Helicoverpa punctigera (Wallengren) (Lepidoptera: Noctuidae) across life stages
Source: PeerJ journal article supplement (doi:10.7717/peerj.12479), 2021-11-17
Supplement: Supplemental_1-Sample_trace_all_life_stages_from_thermolimit_respirometry-supplementary.pdf [file Supplemental_1-Sample_trace_all_life_stages_from_thermolimit_respirometry-supplementary.pdf]

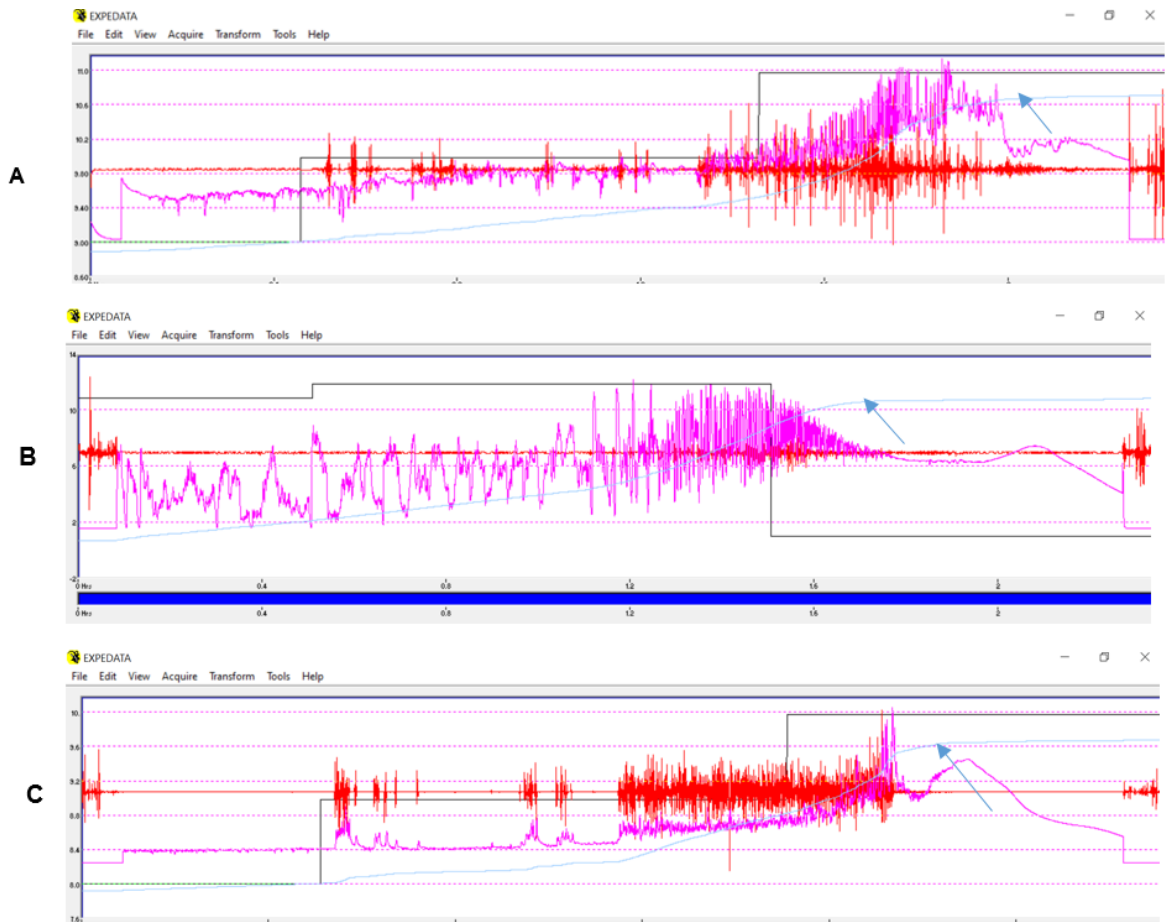

Figure 1: Expedata representative trace from a thermolimit respirometry trial of *H. punctigera* life stages (A: Larva; B: Pupa and C: Adult). VCO<sub>2</sub> (pink) and activity (Red) are shown over the complete ramping period of about 140mins from 25°C to 55°C. The blue arrow indicates CT<sub>max</sub> measured at the cessation of spiracular activity
