# Supplementary material for: Estimating the differences in critical thermal maximum and metabolic rate of Helicoverpa punctigera (Wallengren) (Lepidoptera: Noctuidae) across life stages
Source: PeerJ journal article supplement (doi:10.7717/peerj.12479), 2021-11-17
Supplement: Supplemental_2-Effect__of_different_temperature_phases.pdf [file Supplemental_2-Effect__of_different_temperature_phases.pdf]

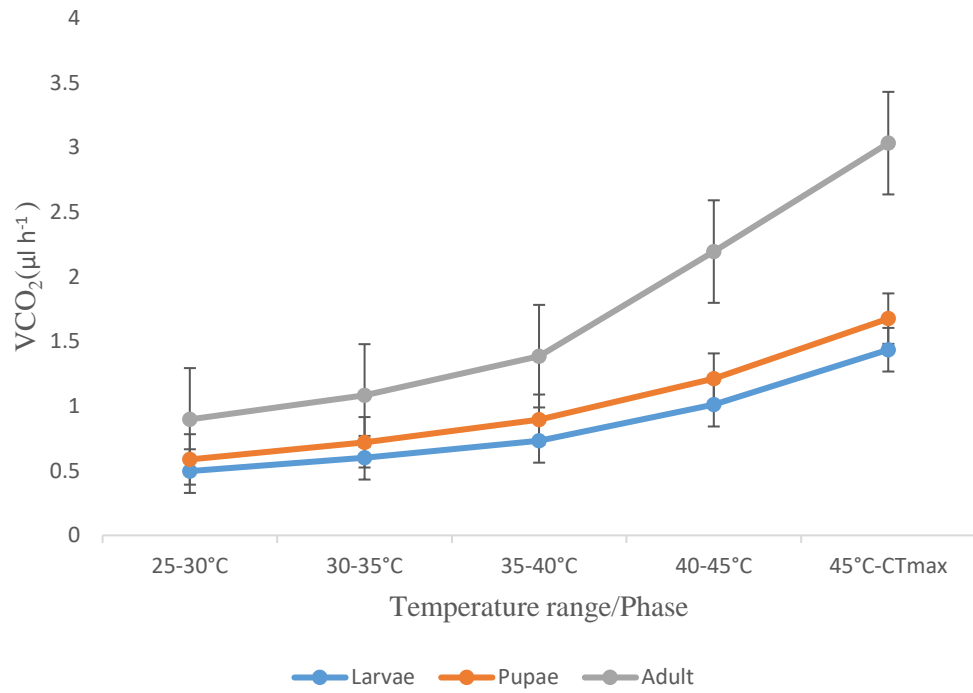

Figure 2. Effect of different temperature phases on VCO<sub>2</sub> in *H. punctigera* life stages (Larvae, Pupae and Adult) during thermolimit respirometry. Points are means ± s.e.m.
