# Supplementary material for: Estimating the differences in critical thermal maximum and metabolic rate of Helicoverpa punctigera (Wallengren) (Lepidoptera: Noctuidae) across life stages
Source: PeerJ journal article supplement (doi:10.7717/peerj.12479), 2021-11-17
Supplement: Supplemental_3-Mass-specific_vco2_for_life_stages.pdf [file Supplemental_3-Mass-specific_vco2_for_life_stages.pdf]

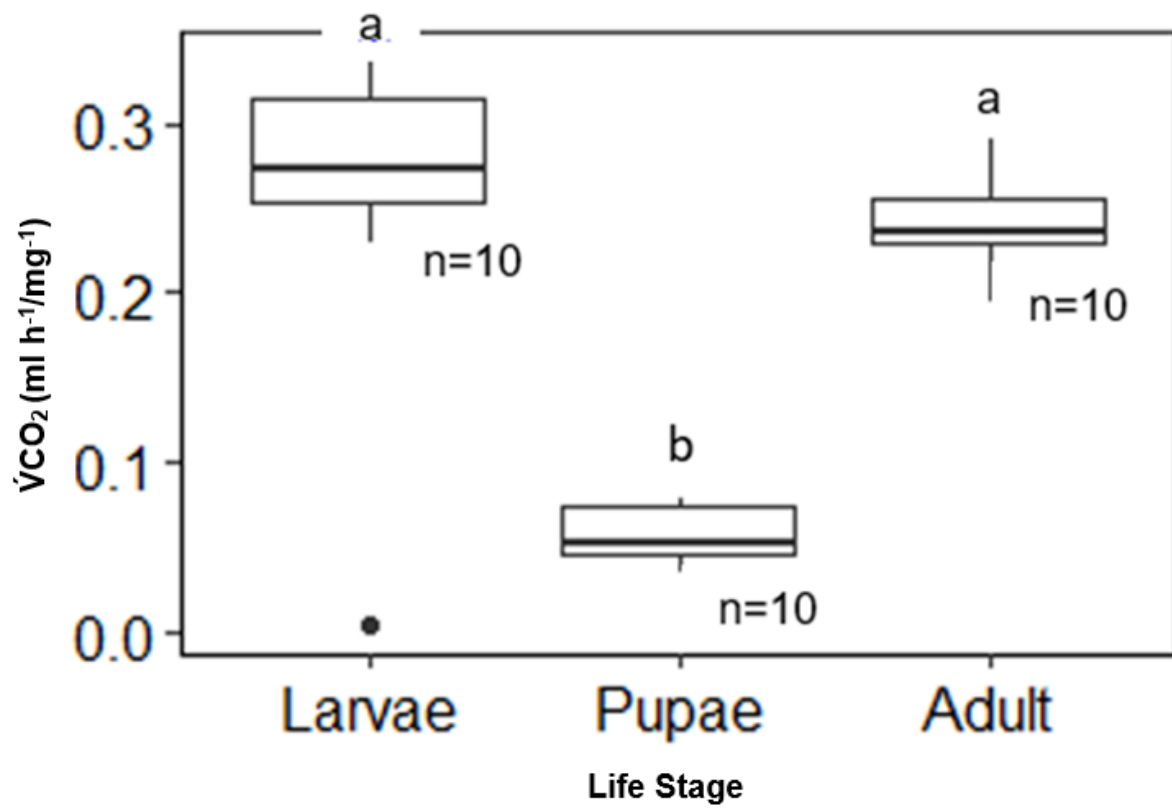

Figure 3: Mass-specific metabolic rate  $\dot{V}CO_2$  (ml h<sup>-1</sup>/mg<sup>-1</sup>) of *H. punctigera* life stages (larvae, pupae and adult) over the complete ramping period of about 120mins from 25°C to CT<sub>max</sub> following thermolimit respirometry. Box plots are significantly different ( $p > 0.05$ ).
