# Supplementary material for: Estimating the differences in critical thermal maximum and metabolic rate of Helicoverpa punctigera (Wallengren) (Lepidoptera: Noctuidae) across life stages
Source: PeerJ journal article supplement (doi:10.7717/peerj.12479), 2021-11-17
Supplement: Supplemental_Table_1-Percentage_weight_loss-supplementary.pdf [file Supplemental_Table_1-Percentage_weight_loss-supplementary.pdf]

Table 1: Percentage weight (mg) loss in three different life stages of *H. punctigera* over the complete ramping period of about 120mins from 25°C to CT<sub>max</sub> following thermolimit respirometry.

| Life Stage | Weight loss (% Mean± SE) |
|------------|--------------------------|
| Larvae     | 22.5±1.0a                |
| Pupae      | 1.9±0.9b                 |
| Adult      | 17.9±1.2c                |

Means within columns are significantly different ( $p > 0.05$ , Tukey-Kramer LSD mean separation).

Note: n=10 in each life stage
